# Supplementary material for: A High-Content Small Molecule Screen Identifies Sensitivity of Glioblastoma Stem Cells to Inhibition of Polo-Like Kinase 1
Source: PLoS One. 2013 Oct 30;8(10):e77053. doi: 10.1371/journal.pone.0077053 (PMC3813721; doi:10.1371/journal.pone.0077053)
Supplement: Table S1 — Spreadsheet containing the full data extracted from the inhibitor screen. Compounds are ranked based on z-score. (XLSX) [file pone.0077053.s007.xlsx]

## Sheet: Screening strategy
				Inhibitors		Cell Lines		Images
			Discovery	160	100nM	CB660	n=3	~300.000
						G179
						G166
						G144
			Validation	2	100nM	CB660	n=8	~25.000
				(J101, cdk/crk)	1 uM	G179
						G166
						G144
						G7
						G14
						G19
						G21
						G25
						G26

## Sheet: Z scores from DMSO controls
Cat. No. 539744-539755				Z from averaged DMSO
				CB660				G179				G166				G144
Library	Plate Loc.	Cat. N.	Description	1	2	3	Mean	1	2	3	Mean	1	2	3	Mean	1	2	3	Mean	GNS
I	H11	569397	Staurosporine, Streptomyces sp.	3.56606	3.75024	3.52447	3.61359	7.18342	5.85343	10.3673	7.8014	2.22446	1.84073	1.97253	2.01257	4.92678	2.5568	4.58928	4.02428	4.61275
I	E6	521233	PDGF Receptor Tyrosine Kinase Inhibitor IV	0.544491	0.85945	0.386706	0.596882	8.52278	7.73933	13.3825	9.88154	0.696207	0.100709	1.14021	0.645711	2.93619	2.14056	3.35541	2.81072	4.44599
II	H8	569397	Staurosporine, Streptomyces sp.	4.12017	4.35165	6.76593	5.07925	7.55323	5.54686	9.42272	7.5076	0.226247	1.77956	0.511067	0.838957	4.45498	3.70727	4.94034	4.36753	4.23803
I	A8	521275	PDK1/Akt/Flt Dual Pathway Inhibitor	0.513841	0.0821851	1.04518	0.54707	8.35488	8.36633	11.8042	9.50847	0.46525	0.905663	0.485105	0.618673	1.97394	0.173816	0.979788	1.04252	3.72322
II	C10	219491	Cdk/Crk Inhibitor	5.26169	5.14072	11.6153	7.33923	4.95582	3.22974	6.65875	4.94811	0.0363076	0.590631	0.24365	0.290196	4.55596	3.9913	5.86805	4.8051	3.3478
I	F9	539648	Staurosporine, N-benzoyl-	0.426104	0.471483	2.04756	0.981717	8.33082	6.30386	2.66619	5.76696	0.536066	1.3747	0.426567	0.779113	2.52568	1.76283	1.46285	1.91712	2.82106
II	B8	217714	Cdk1/2 Inhibitor III	1.34399	1.16592	0.684778	1.06489	6.50394	5.34754	4.8204	5.55729	0.573891	0.452968	0.800636	0.609165	0.590809	0.286393	1.91602	0.931076	2.36584
II	F5	422000	Kenpaullone	0.312618	0.951066	1.69182	0.985168	0.638935	3.09837	3.8905	2.5426	2.81783	1.47527	0.318309	1.53714	3.21924	1.55718	1.29251	2.02298	2.03424
I	A4	124011	Akt Inhibitor IV	6.1424	0.391627	0.548526	2.36085	5.38794	0.797032	0.802648	2.32921	0.267516	0.902616	1.89263	1.02092	2.92217	0.245979	4.75147	2.63987	1.99667
I	F11	572660	SU11652	0.745421	0.433551	0.194461	0.457811	1.76827	1.1643	2.52007	1.81755	3.54125	0.576868	2.0144	2.04417	1.60063	1.41695	1.75158	1.58972	1.81715
I	F6	553210	Rapamycin	2.38432	3.1593	4.11364	3.21909	1.943	1.82854	3.20205	2.32453	0.713255	0.848909	1.13116	0.897773	1.92123	0.836089	3.33085	2.02939	1.75056
II	D2	688000	ROCK Inhibitor, Y-27632	0.69062	0.0822809	0.0494337	0.274111	0.71552	0.40696	1.3354	0.819293	1.12931	1.39008	1.1431	1.22083	3.8709	2.38349	3.22421	3.15953	1.73322
I	E7	521234	PDGF RTK Inhibitor	0.565733	0.90204	2.18886	1.21888	2.07426	1.11135	2.66619	1.9506	1.80155	1.71358	1.98578	1.83364	1.68426	1.00322	1.26811	1.31853	1.70092
I	H6	676485	VEGF Receptor 2 Kinase Inhibitor II	0.432915	1.22745	1.5834	1.08125	3.15549	0.503966	1.45063	1.70336	1.55552	0.834493	0.520778	0.970264	1.03737	0.60653	5.47804	2.37398	1.68254
I	E8	527450	PKR Inhibitor	0.690932	1.19751	0.693285	0.860574	0.12401	0.343323	3.38541	1.28425	2.44912	2.29718	1.98831	2.24487	0.674049	1.63319	1.91194	1.40639	1.64517
I	F4	539652	PKCbII/EGFR Inhibitor	1.00765	0.593263	0.215788	0.605568	1.03187	0.560885	3.09535	1.5627	2.63509	2.29901	1.66419	2.19943	0.974242	1.85861	0.422742	1.0852	1.61578
I	D8	428205	Lck Inhibitor	0.25923	0.084847	1.46373	0.602602	0.698257	0.667479	2.38166	1.24913	2.29193	1.55683	1.85497	1.90124	0.812165	1.52583	2.46677	1.60159	1.58399
II	E9	420123	JNK Inhibitor, Negative Control	1.4316	0.692729	3.412	1.84545	1.43882	0.478663	3.03927	1.65225	2.10668	1.99329	0.416804	1.50559	2.64132	1.5944	0.43538	1.55704	1.57163
II	C8	238803	Cdk2 Inhibitor III	1.56428	0.825734	3.04031	1.81011	0.868981	1.24955	4.39408	2.17087	1.63108	1.43443	1.02714	1.36422	0.30204	1.55718	1.67905	1.17943	1.5715
II	F10	454861	MNK1 Inhibitor	2.09749	1.21963	0.619947	1.31236	1.86546	0.132893	2.87475	1.62437	2.46693	1.58852	1.05794	1.70446	2.1869	1.54115	0.305782	1.34461	1.55781
II	D6	361540	GSK-3b Inhibitor I	0.345756	1.74142	2.91064	1.66594	3.68059	0.178193	1.66158	1.84012	1.80775	1.0909	1.5848	1.49448	1.261	1.36822	1.35133	1.32685	1.55382
I	E5	521232	PDGF Receptor Tyrosine Kinase Inhibitor III	0.527463	2.08923	1.27978	1.29883	1.54404	0.318109	2.14456	1.33557	1.72716	1.50883	1.44606	1.56068	0.274455	1.40254	3.48121	1.7194	1.53855
II	C2	219476	Cdk4 Inhibitor	0.382711	1.02268	0.71071	0.705368	1.16769	1.38998	3.73313	2.09693	2.02984	1.15981	1.39989	1.52985	0.72085	1.37738	0.842747	0.980325	1.5357
I	D10	440203	LY 303511	0.377617	0.83017	0.229418	0.479068	0.863148	0.742915	1.36133	0.989129	1.22327	0.279595	1.55349	1.01879	1.31128	2.39213	3.92252	2.54198	1.51663
I	D9	440202	LY 294002	0.997435	0.729019	0.26644	0.664298	0.189638	0.0798433	2.58716	0.952212	1.63661	0.46993	1.73829	1.28161	0.998204	2.02467	3.85579	2.29289	1.5089
I	C8	365251	Gö 6983	0.214148	0.710386	1.33843	0.754322	0.942448	1.067	0.358373	0.789275	2.93065	1.15517	1.71401	1.93328	1.49235	0.912223	2.7476	1.71739	1.47998
II	D3	328007	ERK Inhibitor II, FR180204	0.105437	1.80792	2.20182	1.37173	0.144806	0.147616	2.33111	0.874512	2.23661	1.42616	0.442862	1.36854	3.01255	1.76906	1.55198	2.1112	1.45142
I	E2	513035	PD 158780	0.844183	0.317095	0.32539	0.495556	1.09203	0.891601	0.35047	0.778032	0.677536	1.71997	1.79645	1.39799	1.67047	1.99652	2.78895	2.15198	1.44267
I	E3	513040	PD 174265	0.772666	0.13875	0.258443	0.389953	1.52955	1.27473	0.832582	1.21229	0.723807	1.51723	0.401945	0.880993	1.20029	1.67378	3.8169	2.23032	1.4412
II	D7	361541	GSK-3b Inhibitor II	0.127372	0.590418	1.91225	0.876678	0.634241	1.24728	2.23812	1.37322	2.35775	0.6449	1.2785	1.42705	1.69398	2.13296	0.716888	1.51461	1.43829
I	E10	528106	PI 3-Kg Inhibitor	0.0719219	1.55686	0.32539	0.65139	0.410586	0.592043	1.92721	0.976615	0.291648	0.661725	1.8142	0.922525	1.79164	2.31641	3.09803	2.40203	1.43372
I	E9	527455	PKR Inhibitor, Negative Control	0.368209	1.4983	1.27712	1.04787	0.0564676	0.413839	1.87831	0.782873	2.62712	1.20171	2.08723	1.97202	1.30156	0.752514	2.46636	1.50681	1.42057
I	B10	317200	DMBI	2.55801	0.824846	0.386706	1.25652	0.501372	0.615548	1.00488	0.707266	2.45222	0.825781	0.44742	1.24181	0.918922	0.850905	5.07685	2.28222	1.41043
II	D8	361549	GSK-3b Inhibitor VIII	1.27139	0.856428	2.03759	1.38847	1.32086	0.631197	2.93198	1.62801	2.34993	1.30639	0.679248	1.44519	1.2817	0.71542	1.40385	1.13366	1.40229
II	F8	444938	MEK Inhibitor II	1.38404	1.95116	0.715032	1.35008	1.39539	1.30674	2.33398	1.6787	2.42785	1.70228	0.185556	1.43856	1.70488	1.04541	0.439162	1.06315	1.39347
II	E7	402081	Indirubin Derivative E804	1.47416	1.44216	1.46275	1.45969	1.3549	0.61421	2.01638	1.32849	2.21492	1.20391	1.3791	1.59931	0.835271	0.103438	2.79668	1.24513	1.39098
II	D5	341251	Fascaplysin, Synthetic	1.76955	1.2401	4.65244	2.55403	2.71463	1.7688	2.03068	2.17137	2.4028	1.00546	0.57323	1.32717	0.245729	0.616069	1.01688	0.626227	1.37492
II	C7	234503	Compound 52	0.963482	2.14555	3.30827	2.1391	0.0344776	1.24275	2.67446	1.31723	2.01133	1.16833	1.79616	1.65861	1.38959	0.309298	1.67737	1.12542	1.36709
II	E2	572635	SU6656	0.140483	0.488969	0.96139	0.530281	0.281249	0.936763	2.12797	1.11533	1.20204	2.04029	0.385672	1.20933	3.19054	1.77736	0.359752	1.77588	1.36685
II	E8	420119	JNK Inhibitor II	1.56678	0.659478	1.78258	1.33628	1.66769	1.22293	2.73884	1.87649	2.52451	1.09627	1.70325	1.77468	0.535242	0.721877	0.0688117	0.441977	1.36438
II	C6	220486	Chk2 Inhibitor II	1.25387	1.08663	1.56648	1.30233	1.69527	0.303123	0.801776	0.93339	1.71895	1.59053	0.614145	1.30787	3.0961	0.935882	1.51015	1.84738	1.36288
II	F4	420298	K-252a, Nocardiopsis sp.	0.204975	2.41668	4.33693	2.31953	1.89539	0.212523	2.4241	1.51067	0.657083	0.835328	0.349215	0.613875	1.27734	1.10267	3.43995	1.93999	1.35484
II	D11	361553	GSK-3b Inhibitor XI	1.0567	0.159015	0.309298	0.508337	1.00337	1.4866	2.05286	1.51427	1.13885	0.178954	0.0307117	0.449505	1.60826	0.977684	3.69395	2.0933	1.35236
I	C10	375670	Herbimycin A, Streptomyces sp.	0.530869	0.644504	0.317092	0.497488	1.26758	0.780087	2.927	1.65822	0.365668	1.56029	1.26488	1.06361	1.44013	0.205654	2.26986	1.30521	1.34235
I	D7	420126	JAK3 Inhibitor VI	1.69639	1.62607	0.360047	1.2275	1.35946	0.711688	1.95567	1.34227	2.48255	0.419746	1.385	1.4291	0.735534	1.85446	1.01511	1.2017	1.32436
I	F2	529574	PP3	1.23923	0.242563	0.626337	0.702711	0.586689	0.0967891	1.25305	0.645508	1.03553	2.50649	0.784406	1.44214	1.15463	1.67771	2.64608	1.82614	1.3046
II	E5	400090	IC261	1.04109	0.516242	3.14836	1.56856	1.85079	1.21104	2.23097	1.76427	1.58827	0.551439	1.02533	1.05501	1.91048	0.71542	0.578235	1.06804	1.29577
I	C2	324674	EGFR Inhibitor	0.340155	0.0722031	0.506371	0.306243	1.56892	0.87568	3.44626	1.96362	0.375409	0.665327	1.67089	0.903877	0.608811	0.16967	2.26494	1.01448	1.29399
II	E4	371957	Isogranulatimide	0.397731	1.89745	3.91769	2.07095	0.415345	0.744448	1.68018	0.946658	2.29325	1.60807	1.78124	1.89419	1.99947	1.04468	0.0688117	1.03765	1.29283
II	E10	420129	JNK Inhibitor V	1.49419	1.10709	3.0792	1.89349	1.07086	0.0989177	1.65157	0.940448	1.97656	1.55871	0.176966	1.23741	1.42264	1.54287	2.00575	1.65709	1.27832
I	F8	555554	Rho Kinase Inhibitor IV	0.436321	1.09902	0.724975	0.753438	0.304214	0.149266	2.16037	0.871283	2.57819	0.728698	1.36018	1.55569	0.131756	1.54613	2.50975	1.39588	1.27428
I	B7	260962	DNA-PK Inhibitor III	0.343561	0.61722	0.908923	0.623235	0.149167	0.531298	1.77705	0.819171	1.96029	1.81833	1.14621	1.64161	0.386802	0.210476	3.46349	1.35359	1.27146
II	F2	475863	MK2a Inhibitor	0.0522725	0.552914	1.29473	0.633305	0.52802	0.431876	1.52424	0.828046	2.57442	0.824304	0.268742	1.22249	2.94753	0.748346	1.52929	1.74172	1.26409
II	C3	219477	Cdk4 Inhibitor II, NSC 625987	0.531002	0.641573	2.88903	1.35387	0.385122	0.115905	1.64728	0.716101	2.08275	1.16307	1.17814	1.47465	2.52835	2.08515	0.107656	1.57372	1.25482
I	C6	344036	cFMS Receptor Tyrosine Kinase Inhibitor	0.1196	0.351034	1.23713	0.569254	1.14398	0.785006	1.51781	1.14893	2.27799	0.262441	1.14168	1.22737	1.052	1.07086	2.01522	1.37936	1.25189
I	B6	260961	DNA-PK Inhibitor II	0.228579	0.194649	0.573019	0.332082	0.630714	0.764712	2.45912	1.28485	3.06947	1.3185	0.324765	1.57091	0.649019	0.604981	1.43092	0.894974	1.25024
I	D3	407601	IRAK-1/4 Inhibitor	0.0685163	0.201969	0.349383	0.206623	0.942448	1.17913	0.0501377	0.723906	0.430904	2.04535	0.707587	1.06128	0.901906	1.72986	3.23681	1.95619	1.24713
I	C5	343021	Flt-3 Inhibitor II	0.237987	0.870098	0.282736	0.463607	0.528717	0.505059	2.54052	1.19143	0.221688	1.14039	0.496519	0.619532	1.2932	1.25089	3.062	1.8687	1.22655
I	D6	420121	JAK3 Inhibitor IV	1.68277	0.553335	1.42108	1.21906	0.718766	0.618282	2.19988	1.17898	2.24633	0.406924	0.994025	1.21576	1.77717	1.63821	0.436134	1.28384	1.22619
I	D5	420104	JAK3 Inhibitor II	2.79299	0.840817	0.522667	1.38549	0.0728746	0.334508	1.70987	0.705751	2.94084	0.847862	1.65078	1.81316	1.90557	0.938408	0.555672	1.13322	1.21738
II	G6	559396	SB220025	0.463412	1.09686	0.270399	0.610224	1.09081	0.500959	1.82896	1.14024	1.8543	1.13876	1.06692	1.35333	0.524336	0.24157	2.55509	1.107	1.20019
II	F6	422708	KN-93	0.470327	0.65011	3.48548	1.53531	1.23107	0.399033	2.24528	1.29179	2.07321	1.85988	1.53914	1.82408	0.153829	1.1907	0.106626	0.483719	1.19986
I	D11	448101	Met Kinase Inhibitor	1.02809	1.03247	0.397369	0.819309	1.45954	0.3876	0.0532991	0.633481	2.25917	0.510807	0.537627	1.10253	1.16028	2.03601	2.33536	1.84388	1.1933
II	D4	328008	ERK Inhibitor II, Negative control	1.00604	0.521357	3.29963	1.60901	0.254841	0.418852	0.51422	0.395971	2.12855	0.776195	0.900776	1.26851	3.35146	1.45411	0.859553	1.88837	1.18428
I	E4	521231	PDGF Receptor Tyrosine Kinase Inhibitor II	2.91559	0.553335	1.25579	1.57491	0.483051	0.636799	2.09477	1.07154	0.922175	2.1198	1.5602	1.53406	0.117577	1.70979	1.00406	0.943807	1.18313
I	C4	343020	Flt-3 Inhibitor	1.04252	0.450188	0.506671	0.666459	0.359178	0.554872	1.86003	0.924695	0.957598	2.09006	1.17629	1.40798	0.171088	1.33533	2.00908	1.17184	1.16817
II	F9	444939	MEK1/2 Inhibitor	1.24886	1.13778	1.60106	1.32923	2.22402	0.0165984	1.93054	1.39039	1.72859	1.03077	0.464953	1.07477	1.97259	0.497821	0.630986	1.0338	1.16632
I	F10	567805	Src Kinase Inhibitor I	0.381022	1.47168	0.20779	0.686831	0.839084	0.684425	1.04993	0.857812	2.12611	1.01977	1.56781	1.57123	1.87686	0.0332664	1.10301	1.00438	1.14447
II	F11	481406	NF-kB Activation Inhibitor	0.265055	0.526473	0.248249	0.346592	2.21229	2.06835	3.8161	2.69891	0.353853	0.308746	0.144189	0.268929	0.549399	0.314738	0.474876	0.446338	1.13806
II	B7	217696	Cdk1 Inhibitor, CGP74514A	0.755706	0.266442	0.131553	0.384567	0.6941	1.59836	2.76745	1.68664	1.42058	0.427661	0.389226	0.745822	0.732846	0.618803	1.56603	0.97256	1.13501
I	D4	420099	JAK Inhibitor I	0.953162	1.03247	0.0241431	0.669926	0.308042	0.00105911	2.29473	0.867943	0.515255	0.170285	1.38699	0.690844	0.573683	1.41302	3.52788	1.83819	1.13233
I	C11	343022	Flt-3 Inhibitor III	5.23821	3.05549	1.42641	3.24004	1.47185	0.358082	1.16848	0.999471	2.25186	1.19167	1.92979	1.79111	0.892249	0.412104	0.410461	0.571604	1.12073
II	C5	219479	Cdc2-Like Kinase Inhibitor, TG003	0.74319	0.230633	4.15108	1.7083	0.832597	0.170266	1.7231	0.908654	2.00161	1.33345	1.3531	1.56272	1.02199	0.503548	1.07402	0.866519	1.11263
II	F3	420135	JNK Inhibitor VIII	1.01105	0.0174729	1.58377	0.870762	1.15947	0.699148	1.58862	1.14908	2.59405	0.870407	1.00499	1.48981	1.30713	0.546495	0.228473	0.694033	1.11098
II	D9	361550	GSK-3 Inhibitor IX	1.13371	0.196518	3.32988	1.55337	2.69116	0.546259	1.33683	1.52475	1.18409	1.77093	1.32213	1.42572	0.808037	0.240869	0.0520053	0.36697	1.10581
II	E3	361555	GSK-3 Inhibitor XIII	0.560447	1.31939	2.85446	1.5781	0.753958	0.390539	0.578598	0.574365	2.61592	1.16432	0.701401	1.49388	1.66529	1.34961	0.652834	1.22258	1.09694
II	G4	513000	PD 98059	0.495361	0.316734	1.67453	0.828875	0.134829	1.0338	3.74243	1.63702	1.97862	0.789077	1.09902	1.28891	0.511985	0.454874	0.109756	0.358872	1.09493
I	F5	539654	PKCb Inhibitor	2.03355	0.356357	0.85857	1.08282	0.283158	0.500755	0.263532	0.349148	1.70591	1.75081	1.45004	1.63559	0.181012	0.955647	2.69152	1.27606	1.08693
II	G5	513030	PD 169316	1.31645	0.150478	0.123449	0.530126	0.0594188	0.977533	2.14585	1.06093	1.93842	0.956601	0.975825	1.29028	0.580275	1.19143	0.878229	0.883312	1.07818
I	E11	528108	PI 3-Kb Inhibitor II	1.77391	0.564648	0.301097	0.879885	0.245696	0.649918	0.220952	0.372189	1.35832	0.367919	0.314257	0.680165	0.56351	2.05216	3.88363	2.16643	1.07293
II	G7	540500	Purvalanol A	0.805773	0.0149151	0.399521	0.406736	0.603724	0.640824	1.57002	0.93819	1.44918	1.21894	1.30156	1.32323	1.30276	0.673203	0.852599	0.942856	1.06809
II	B6	217695	Cdk1 Inhibitor	0.908409	0.186287	1.38063	0.825109	1.1313	0.238216	2.72454	1.36469	1.42955	0.280329	0.271228	0.66037	0.975855	0.325904	2.08283	1.1282	1.05108
II	B9	217720	Cdk1/5 Inhibitor	0.124869	0.902468	0.464893	0.49741	0.627785	0.606282	1.92553	1.0532	1.44357	0.177097	1.09812	0.906263	1.99256	0.757666	0.796298	1.18217	1.04721
II	A7	128125	Aloisine A, RP107	0.733771	0.274115	0.888455	0.632114	1.48752	0.846374	3.46703	1.93364	1.02855	0.709796	0.456199	0.731514	0.877053	0.295841	0.0936012	0.422165	1.02911
II	F7	444937	MEK Inhibitor I	1.12369	0.0149151	0.667489	0.602033	0.681776	0.131548	0.0564203	0.289915	2.17547	1.07161	0.439635	1.22891	1.79242	0.792725	2.11182	1.56566	1.02816
I	H7	676487	VEGF Receptor 2 Kinase Inhibitor III	1.06895	0.621612	0.211789	0.634118	0.97827	0.981249	3.80587	1.9218	1.03467	0.813737	0.483637	0.777349	0.0158545	0.735493	0.394377	0.381908	1.02702
II	G9	371963	H-89, Dihydrochloride	0.530407	0.549493	3.06192	1.38061	0.287411	0.356564	2.41194	1.01864	1.85112	0.502128	0.347859	0.900369	0.431709	0.844705	2.19165	1.15602	1.02501
I	G10	658550	AG 1295	1.09279	0.707724	1.02919	0.943235	1.65916	0.7697	1.44036	1.28974	0.628829	1.62782	0.238345	0.831663	0.657835	0.963939	1.21735	0.946373	1.02259
I	G6	616453	TGF-b RI Inhibitor III	1.66574	1.25607	0.256077	1.0593	0.255266	0.986169	1.53757	0.926336	2.14382	0.735085	0.065848	0.981585	0.090903	1.75256	1.55918	1.13421	1.01404
II	B3	402085	Indirubin-3′-monoxime	0.636141	0.0362407	0.131553	0.267978	0.251613	0.0970066	1.71022	0.686281	1.71895	0.64941	0.796341	1.0549	1.05286	0.0988571	2.72609	1.2926	1.01126
I	A5	124012	Akt Inhibitor V, Triciribine	2.21745	1.3511	0.666626	1.41172	1.73901	1.04083	1.4941	1.42465	1.14818	0.982491	0.496138	0.875603	0.815844	0.243208	1.1198	0.726282	1.00884
II	C4	219478	Cdk4 Inhibitor III	0.0397559	0.350849	2.27962	0.890075	0.616928	0.386363	1.25099	0.751428	1.53406	1.44094	0.140798	1.0386	1.8974	0.386889	1.40427	1.22952	1.00652
II	G10	559387	SB 202474, Negative control for p38 MAPK inhibition studies	0.515387	0.234885	1.50165	0.75064	0.648325	0.176849	2.4427	1.08929	0.787946	1.23548	0.486716	0.836714	1.73756	0.517004	1.0173	1.09062	1.00554
II	C9	238804	Cdk2 Inhibitor IV, NU6140	0.795759	0.521357	2.05055	1.12256	0.245158	0.836748	1.8447	0.975536	2.04031	1.1573	0.545878	1.24783	1.11025	0.18488	1.011	0.768712	0.997359
II	E11	420136	JNK Inhibitor IX	0.498459	0.334639	0.0451116	0.292736	0.953488	0.0188634	0.735967	0.56944	1.92384	0.631369	0.467275	1.0075	2.78008	1.22191	0.212086	1.40469	0.993876
I	C3	324840	EGFR/ErbB-2/ErbB-4 Inhibitor	0.701148	0.127437	0.168102	0.332229	1.14672	0.114281	0.44136	0.567453	1.76369	0.354233	2.22076	1.44623	1.11575	1.3098	0.204953	0.876835	0.963505
I	H5	676483	VEGFR Tyrosine Kinase Inhibitor IV	0.299288	0.004991	1.40665	0.570309	0.176786	0.669666	1.50527	0.783906	0.933651	0.74918	0.213868	0.632233	0.401269	0.558742	3.36949	1.44317	0.953102
I	G8	658401	AG 490	0.654279	0.508749	0.309095	0.490708	0.624972	1.38959	0.558332	0.85763	1.37802	0.913558	1.29097	1.19418	0.303553	0.783478	1.29788	0.794969	0.948928
I	G7	658390	AG 9	1.87348	1.68995	0.7546	1.43934	0.02338	0.555965	1.51623	0.698526	0.472304	1.90063	0.855245	1.07606	0.916662	1.29518	0.966688	1.05951	0.9447
I	F7	555553	Rho Kinase Inhibitor III, Rockout	0.25161	0.678443	0.1761	0.368717	0.747478	0.177145	1.81103	0.911885	0.117929	1.69461	0.609572	0.807369	0.101013	1.79467	1.31682	1.07084	0.93003
II	G2	506121	p38 MAP Kinase Inhibitor III	0.830806	0.636458	1.87767	1.11498	0.909181	1.24728	0.53568	0.897381	1.23531	0.581507	1.23262	1.01648	0.920633	0.454745	1.25091	0.87543	0.929763
I	B11	324673	EGFR/ErbB-2 Inhibitor	0.595575	1.17887	0.141143	0.638531	0.229015	0.593068	2.18171	1.00126	1.53787	1.19203	0.0576951	0.929199	0.619859	0.699706	1.21477	0.844779	0.925081
I	G11	658551	AG 1296	1.00506	0.22393	0.482678	0.570554	0.594892	0.0568162	0.990652	0.547453	1.5516	1.35445	1.25202	1.38602	0.460494	1.1708	0.883702	0.838333	0.923936
I	C9	371806	GTP-14564	2.00971	0.340386	1.2318	1.19396	0.52817	0.416572	2.04972	0.998154	2.04353	0.521392	1.60621	1.39038	0.685803	0.110317	0.289285	0.361802	0.916778
I	G4	574713	Syk Inhibitor III	0.238796	0.929324	0.00281586	0.390312	0.482231	0.541137	1.27044	0.764601	0.673551	1.48201	1.17375	1.10977	0.960742	1.36285	0.188987	0.837527	0.903966
I	G5	616451	TGF-b RI Kinase Inhibitor	0.0480828	1.15292	0.0774611	0.426155	0.812833	0.59259	2.02364	1.14302	0.592964	0.332517	1.51853	0.814669	0.0976845	0.494566	1.64965	0.7473	0.901663
I	H2	658552	AG 1478	1.7032	0.0289478	0.192095	0.641415	0.0080668	0.0141784	1.31954	0.44726	1.28706	0.422435	0.807759	0.839085	0.992841	1.35107	1.82966	1.39119	0.892511
I	D2	407248	IGF-1R Inhibitor II	2.10766	0.753641	0.978236	1.27985	0.12401	0.0306459	0.293565	0.149407	0.324932	0.745852	0.0493792	0.373387	1.35378	1.47957	3.50659	2.11331	0.878703
II	B10	218696	Casein Kinase I Inhibitor, D4476	0.174935	1.43193	1.17749	0.92812	1.19175	0.478875	1.4384	1.03634	1.17044	0.221697	0.509321	0.63382	0.792418	0.761674	1.32444	0.95951	0.876558
II	A4	118501	ATM/ATR Kinase Inhibitor	0.970992	0.935719	1.28609	1.06427	0.187646	0.0706049	1.38189	0.546715	0.537997	3.5755	0.0763737	1.39662	0.716682	1.09695	0.152613	0.655414	0.86625
I	B9	266788	Diacylglycerol Kinase Inhibitor II	0.235391	0.0855125	0.38404	0.234981	1.86671	1.22669	0.89423	1.32921	2.0256	0.105272	0.253908	0.794925	0.239807	0.601489	0.573393	0.471563	0.865233
II	A6	126871	Alsterpaullone, 2-Cyanoethyl	0.295689	0.442929	0.183418	0.307345	0.853136	1.28919	1.854	1.33211	0.62848	0.764773	0.344694	0.579316	0.825464	0.201773	0.893775	0.640337	0.850587
II	B11	218710	Casein Kinase II Inhibitor III, TBCA	1.18377	0.357659	1.12563	0.889021	0.160357	0.0941753	2.42768	0.894071	0.902359	0.469255	0.537577	0.636397	0.833455	0.13207	2.09249	1.01934	0.849936
II	E6	401481	IKK-2 Inhibitor IV	0.875866	2.17113	0.697744	1.24825	0.327904	0.329171	0.557139	0.404738	2.26951	1.47727	0.744576	1.49712	0.687804	0.927293	0.2253	0.613466	0.838441
II	B4	196870	BAY 11-7082	0.0672924	0.123205	1.79987	0.663456	0.166519	0.525874	0.848271	0.513555	1.2155	1.08314	0.548427	0.94902	0.794225	0.521457	1.68326	0.999646	0.82074
II	B2	189406	Aurora Kinase/Cdk Inhibitor	0.335743	0.426719	0.360623	0.374361	1.62015	1.01852	1.60293	1.41386	1.20503	0.00746524	0.0225739	0.411689	0.571194	0.0792303	1.2341	0.628176	0.81791
II	H2	559389	SB 203580	0.795759	2.1123	1.57512	1.4944	1.28829	0.17515	0.130813	0.531417	1.5578	0.993538	1.20572	1.25235	1.35544	0.462032	0.186457	0.667977	0.817248
II	D10	361551	GSK-3 Inhibitor X	0.803269	0.655226	1.12563	0.861375	0.805015	0.858832	1.44413	1.03599	1.23326	1.45998	0.0796005	0.92428	0.140761	0.321037	0.956379	0.472726	0.810999
II	B5	203600	Bohemine	0.402738	1.76956	1.73072	1.301	0.0611793	1.48964	2.19592	1.24891	0.828701	0.129092	0.772832	0.576875	0.667462	0.212237	0.763526	0.547742	0.791177
I	H9	260964	DNA-PK Inhibitor V	0.112789	0.569307	0.394404	0.358833	1.73053	0.850534	0.934537	1.17187	0.987118	0.275168	0.879522	0.713936	0.305859	0.46478	0.452627	0.407755	0.76452
I	G9	658440	AG 112	1.06636	0.422904	0.194761	0.56134	0.197021	1.23598	0.641417	0.691474	0.60824	0.984911	1.4312	1.00812	0.902811	0.532971	0.318642	0.584808	0.761466
II	H7	567731	Sphingosine Kinase Inhibitor	1.11428	0.437813	2.12284	1.22498	0.110475	1.11365	1.43143	0.885184	1.58117	0.631222	0.127523	0.779971	1.01762	0.103281	0.688548	0.603149	0.756101
II	G11	559388	SB 202190	0.407744	0.00979953	1.62267	0.68007	1.79856	0.560982	0.6394	0.999646	0.933018	0.89822	0.793013	0.87475	0.53161	0.39691	0.16923	0.365917	0.746771
II	G8	361554	GSK3b Inhibitor XII, TWS119	0.57046	0.153899	1.16453	0.629629	0.294453	0.0666411	2.10293	0.821341	1.70567	0.512101	0.045857	0.754544	0.168721	0.86217	0.954278	0.661723	0.74587
I	F3	529581	PP1 Analog II, 1NM-PP1	0.501027	0.202635	0.397369	0.36701	0.707554	0.558083	1.48857	0.91807	0.0153494	0.70388	0.964856	0.561362	0.560798	0.779332	0.895164	0.745098	0.74151
I	H8	676489	VEGF Receptor 2 Kinase Inhibitor IV	0.25923	0.83017	0.354415	0.481271	0.950925	0.450942	1.72805	1.0433	0.437103	1.2789	0.388539	0.701513	0.217491	0.770189	0.432976	0.473552	0.739457
I	A6	124018	Akt Inhibitor VIII, Isozyme-Selective, Akti-1/2	0.998244	0.0828506	0.141443	0.407512	0.308589	0.647253	2.24335	1.0664	0.129442	1.06673	0.366598	0.520922	0.406016	0.570285	0.811124	0.595808	0.72771
I	A3	121790	AGL 2043	0.248204	0.0768614	0.610642	0.311902	0.795058	0.731982	0.487991	0.671677	2.04641	0.948183	0.09576	1.03012	0.0533166	1.2474	0.129509	0.476741	0.726178
I	B4	220285	Chelerythrine Chloride	1.14468	0.282491	0.101454	0.509543	0.988115	0.060096	0.452425	0.500212	2.07076	0.290314	0.36879	0.909955	0.913723	0.167466	1.10518	0.728788	0.712985
I	C7	365250	Gö 6976	1.32178	0.184002	0.178465	0.561414	0.107603	0.609467	1.30916	0.675411	0.0703296	1.17233	1.71057	0.984409	0.588376	0.352728	0.39777	0.446291	0.702037
I	B8	528100	PI-103	0.269446	0.399613	0.0398386	0.236299	1.16586	0.167852	2.08607	1.13993	0.255782	0.669754	0.163882	0.363139	0.0675577	0.126879	1.60503	0.599821	0.700963
II	H10	572650	SU9516	0.280075	0.882869	0.598336	0.587093	0.690578	0.0575811	0.598627	0.448929	1.002	0.797997	1.48563	1.09521	0.191252	0.263201	1.12144	0.525297	0.689812
II	C11	328009	ERK Inhibitor III	0.0122193	0.396026	0.750149	0.386131	0.729311	1.01625	1.3776	1.04105	0.317024	0.949084	0.278236	0.514781	0.774255	0.673046	0.0320267	0.493109	0.682982
II	A3	118500	ATM Kinase Inhibitor	0.373292	1.31683	0.611843	0.767322	1.1404	0.856921	0.531388	0.842903	0.000600571	0.457979	1.80384	0.754141	0.094048	0.788874	0.287064	0.389995	0.662347
I	B5	234505	Compound 56	2.56141	0.454846	0.242447	1.08624	0.0747888	0.301778	0.134705	0.170424	0.621302	1.03254	2.10191	1.25192	1.32355	0.0234468	0.240569	0.529189	0.65051
I	G3	574712	Syk Inhibitor II	0.782883	0.844144	2.01024	1.21242	0.315426	0.0611893	1.01831	0.464976	0.173203	0.363357	0.588737	0.375099	0.419291	0.430848	2.48273	1.11096	0.650344
I	A2	121767	AG 1024	0.225174	0.944497	0.407733	0.525801	1.00972	0.560885	0.3316	0.634067	0.374302	0.822631	0.828594	0.675176	0.287792	0.112281	1.50023	0.633433	0.647559
I	H4	676481	VEGF Receptor Tyrosine Kinase Inhibitor II	1.00165	0.737004	1.64738	1.12868	0.0386933	0.450942	1.32734	0.605659	1.1463	1.06972	1.23136	1.14913	0.0210537	0.215931	0.276067	0.171017	0.641935
I	H10	189405	Aurora Kinase Inhibitor III	0.517246	0.454846	0.687653	0.553248	0.762518	0.118655	0.876052	0.585741	0.693684	0.402227	0.204447	0.433453	0.171993	1.55488	0.906627	0.877832	0.632342
I	A7	124020	Akt Inhibitor X	1.16852	1.03846	0.42906	0.878682	0.969793	0.600243	1.13529	0.901774	0.467212	0.708211	1.15686	0.77743	0.228053	0.279845	0.132375	0.213424	0.630876
II	A11	189405	Aurora Kinase Inhibitor III	0.150497	0.350849	0.158026	0.21979	0.435004	1.12249	1.27907	0.945522	0.44957	0.937662	0.508354	0.631862	0.126231	0.106716	0.642751	0.291899	0.623095
I	B2	203297	Bisindolylmaleimide IV	0.31291	0.414918	0.311761	0.34653	1.06632	0.817258	2.18171	1.3551	0.148039	0.340546	0.428759	0.305781	0.0873088	0.0193226	0.490699	0.19911	0.619996
II	A10	171260	AMPK Inhibitor, Compound C	0.475929	1.15313	1.59241	1.07382	0.731658	0.837314	0.0220853	0.530353	0.555589	1.1568	0.059872	0.590754	0.762259	0.484522	0.934048	0.726943	0.616017
II	A2	422706	KN-62	0.278166	0.45997	0.326586	0.354908	0.490462	0.451695	1.08862	0.676924	0.986485	0.615437	0.865354	0.822425	0.358343	0.668622	0.00788851	0.344951	0.614767
II	G3	506126	p38 MAP Kinase Inhibitor	1.37152	0.961297	0.66803	1.00028	0.300028	0.93563	0.953422	0.729694	0.516685	1.14979	0.765825	0.810765	0.688521	0.197478	0.0198421	0.301947	0.614135
II	H4	559402	SB 218078	0.678698	0.3841	0.832268	0.631689	1.11839	0.104934	0.7889	0.670743	0.79505	0.727288	0.454554	0.658964	0.638031	0.476505	0.295887	0.470141	0.599949
II	H3	371970	HA 1077, Dihydrochloride Fasudil	0.280669	0.0899542	1.92402	0.764882	1.5735	0.0630313	0.240256	0.625595	0.20336	0.755251	1.00973	0.656114	0.614066	0.175833	0.756803	0.515567	0.599092
II	H9	570250	STO-609	0.0653837	0.629648	0.0623999	0.252477	0.282129	0.1697	1.24813	0.566653	0.570713	0.144126	0.172055	0.295631	1.43099	0.172153	1.1278	0.910315	0.590867
II	H5	565625	SC-68376	0.766314	0.0686287	1.88253	0.905825	0.134242	0.0989177	0.0456906	0.0929502	0.853565	1.31243	0.529439	0.898478	0.854169	0.768388	0.698821	0.773793	0.588407
I	A10	197221	Bcr-abl Inhibitor	1.00506	0.872759	0.48801	0.788608	0.640559	0.559176	1.10051	0.766748	0.615399	0.890699	0.833486	0.779861	0.0302596	0.0751848	0.453855	0.186433	0.577681
I	A11	203290	Bisindolylmaleimide I	0.00640678	0.321753	0.791923	0.373361	0.579579	0.583229	1.6088	0.92387	0.508466	0.378456	0.799787	0.562236	0.474899	0.101785	0.0394462	0.205377	0.563828
II	H6	567305	SKF-86002	0.483439	0.595533	0.339553	0.472841	0.589053	0.403917	1.20235	0.731774	0.938066	0.455326	0.115593	0.502995	0.224307	0.624243	0.36681	0.40512	0.54663
II	H11	616373	Tpl2 Kinase Inhibitor	0.590487	0.267209	0.753931	0.537209	0.461706	0.137989	1.13654	0.578746	0.19663	0.298724	0.797398	0.430917	0.508725	0.726744	0.572773	0.602747	0.53747
I	H3	676480	VEGF Receptor 2 Kinase Inhibitor I	1.99268	0.0642175	2.07632	1.37774	0.102681	0.427437	0.432666	0.320928	0.583076	0.390683	0.816274	0.596677	0.707792	0.505934	0.437362	0.550363	0.489323
II	A5	126870	Alsterpaullone	0.322631	0.856428	0.456248	0.545102	0.84316	0.221795	1.09362	0.719526	0.0270677	0.359758	0.553852	0.313559	0.0459456	0.201644	0.831591	0.359727	0.464271
I	B3	203696	BPIQ-I	0.163064	0.747652	0.237415	0.38271	0.156824	0.185276	0.501427	0.281176	0.310909	1.36722	0.176727	0.618286	0.814487	0.264134	0.120094	0.399572	0.433011
I	A9	189404	Aurora Kinase Inhibitor II	0.551302	0.319091	0.490376	0.45359	0.264837	0.644999	0.0225743	0.310803	0.276225	0.430647	0.262242	0.323038	0.505642	0.484135	0.64135	0.543709	0.392517
II	A9	164640	Aminopurvalanol A	0.300101	0.265578	0.230961	0.265547	0.369277	0.0445572	0.391187	0.26834	0.0715614	0.0758692	1.32852	0.491985	0.315835	0.000207578	0.462691	0.259578	0.339968
II	A8	128135	Aloisine, RP106	0.0353438	0.567397	0.534046	0.378929	0.860766	0.170266	0.660859	0.563964	0.244568	0.00395734	0.560436	0.269654	0.0477618	0.236631	0.19654	0.160311	0.33131
I	G2	574711	Syk Inhibitor	0.650873	1.20017	0.400035	0.750359	0.0860003	0.255792	0.0936069	0.145133	0.0144639	0.84841	0.0468246	0.303233	0.342948	0.071017	0.854518	0.422828	0.290398
II	F1	DMSO		0.896487	0.355964	0.161807	0.47142	1.47432	2.07345	1.53497	1.69425	0.359274	2.82405	1.1607	1.44801	2.00565	1.45411	1.17635	1.54537	1.56254
I	E12	DMSO		0.855209	1.1263	0.514369	0.83196	0.77537	2.85567	0.0770095	1.23602	0.214235	1.8749	0.860481	0.983207	1.4885	0.553701	2.14459	1.3956	1.20494
I	H12	DMSO		0.670498	0.819522	0.448022	0.646014	1.66709	0.660304	0.661176	0.996191	0.877528	0.274486	0.647963	0.599992	1.25754	2.58505	1.155	1.66587	1.08735
I	D12	DMSO		1.03251	0.532706	0.317092	0.627437	0.920572	1.35016	1.31875	1.19649	2.31739	0.685729	1.03292	1.34535	1.21259	0.378695	0.345902	0.645729	1.06252
II	G1	DMSO		0.663678	0.17094	2.02462	0.953079	1.63042	1.08194	0.126521	0.946293	1.30804	0.435428	1.33796	1.02714	0.351432	1.13961	1.22024	0.90376	0.959065
II	H12	DMSO		0.605507	1.50073	0.485963	0.864068	0.0200997	1.34107	1.10525	0.822139	1.82204	0.638489	0.616694	1.02574	0.514528	0.688091	1.87065	1.02442	0.957433
II	A12	DMSO		0.65307	0.467644	0.0407895	0.387168	0.329664	0.613997	1.95557	0.966412	1.83391	0.515609	1.24828	1.19926	1.01072	0.529187	0.547143	0.695682	0.953786
II	A1	DMSO		2.91332	0.907583	0.732321	1.51774	0.804134	1.61061	1.41569	1.27681	0.481352	0.391207	0.57917	0.483909	1.0878	1.27246	0.87991	1.08006	0.946925
II	D1	DMSO		0.856434	1.3842	1.21261	1.15108	1.28506	0.806737	0.0757337	0.72251	1.7898	0.51471	1.26591	1.19014	0.0797271	1.74449	0.760395	0.861538	0.924729
I	D1	DMSO		0.48319	0.857454	0.00518185	0.448609	0.267845	0.429145	1.03965	0.578881	0.596727	2.25995	0.719889	1.19219	1.03098	1.4883	0.261447	0.92691	0.899327
II	C1	DMSO		0.260048	1.11614	1.89982	1.092	1.02303	0.488501	0.0537378	0.521756	0.236637	1.50408	0.483777	0.741499	0.588275	1.93569	1.36988	1.29795	0.853735
I	F1	DMSO		1.464	1.42975	1.08487	1.32621	1.17652	0.0218997	1.69564	0.964688	1.1711	0.708759	0.409555	0.763136	1.78356	0.234239	0.12255	0.71345	0.813758
I	B12	DMSO		0.269106	1.32794	2.26084	1.28596	1.74175	0.693103	0.850069	1.09497	0.0222874	0.389088	1.3598	0.590391	0.885919	1.17104	0.0214335	0.692799	0.792721
II	H1	DMSO		0.603598	0.527336	0.352519	0.494484	0.514229	0.258035	1.67464	0.815634	0.504159	1.05117	0.969218	0.841515	0.95841	0.306148	0.534538	0.599699	0.752282
I	A1	DMSO		1.25366	0.558659	0.759932	0.857418	0.487153	0.0694572	1.46022	0.672276	1.40356	0.541235	1.83377	1.25952	0.781213	0.00489885	0.163815	0.316642	0.74948
II	G12	DMSO		0.312618	0.736212	1.38063	0.80982	1.43471	0.247843	0.931247	0.871266	0.614832	0.907995	0.702005	0.741611	1.35108	0.450164	0.0999036	0.633714	0.748864
I	E1	DMSO		0.415078	1.06242	1.16752	0.88167	0.422618	0.23338	0.104771	0.25359	0.643295	0.325217	1.58719	0.851901	1.08953	1.68251	0.641759	1.13793	0.747808
I	C1	DMSO		0.837372	0.237239	1.30614	0.793584	1.80956	1.40155	0.489571	1.23356	0.258735	0.826847	0.46898	0.518187	0.352018	0.112935	0.83908	0.434678	0.728808
I	A12	DMSO		0.276258	0.239235	0.0105137	0.175336	0.573016	0.370108	1.27992	0.741015	0.0459764	1.19308	0.502298	0.580452	0.758608	0.152868	1.50338	0.804953	0.708807
I	G1	DMSO		0.37502	0.130764	1.51705	0.674277	0.532272	0.507246	1.38187	0.807131	0.330134	0.863837	0.587106	0.593692	0.0890324	0.418432	1.63561	0.714359	0.705061
I	F12	DMSO		0.885051	0.0768614	0.463717	0.47521	0.541296	0.642334	0.16948	0.451037	1.24678	0.915383	0.790203	0.984122	1.15147	0.472264	0.407887	0.677205	0.704122
II	E1	DMSO		1.44221	1.0261	1.06998	1.17943	0.356953	0.918643	0.506531	0.594042	0.474061	0.826662	0.744576	0.681766	0.558126	0.213898	1.55324	0.775087	0.683632
II	F12	DMSO		0.713744	1.15655	0.369267	0.746521	1.33318	0.167222	0.120262	0.540222	0.832519	0.213282	0.833272	0.626358	1.89885	0.13048	0.442523	0.823952	0.663511
I	G12	DMSO		2.38092	0.465494	0.818582	1.22166	0.238039	0.499046	1.2081	0.648394	0.866827	0.189033	1.07211	0.709324	0.652184	0.0860736	1.0285	0.588921	0.648879
II	E12	DMSO		0.117953	0.291156	0.789048	0.399386	0.965225	0.516035	0.377596	0.619619	0.0723325	0.138761	1.11785	0.44298	0.762268	1.04497	0.830562	0.879266	0.647288
I	C12	DMSO		0.0608963	0.170027	0.309395	0.180106	0.953386	0.149745	0.461119	0.521417	1.03951	0.983038	0.183992	0.735514	0.422455	0.567012	1.04049	0.676654	0.644528
I	H1	DMSO		0.518949	0.711051	1.0926	0.774201	0.362186	0.875202	0.586093	0.607827	1.06593	0.182256	1.12155	0.789915	0.435855	0.742258	0.0777179	0.41861	0.60545
II	B1	DMSO		0.6005	1.1608	0.823084	0.861463	0.0359447	0.296895	0.850417	0.394419	1.14528	0.759761	0.0757577	0.660268	0.279156	0.462476	0.911422	0.551018	0.535235
II	C12	DMSO		0.0503637	0.404562	0.547012	0.333979	0.69498	0.605716	0.842012	0.714236	0.277358	0.344326	0.484619	0.368768	0.298045	0.108592	0.794428	0.400355	0.494453
II	B12	DMSO		0.350168	1.65446	0.296332	0.766986	0.18882	0.986806	0.0793103	0.418312	0.204668	0.316912	0.456425	0.326002	0.725209	0.791451	0.207233	0.574631	0.439648
II	D12	DMSO		0.350762	0.918678	0.148841	0.47276	1.01746	1.08456	0.213253	0.771754	0.0106163	0.0872479	0.604035	0.233967	0.311476	0.347664	0.0288965	0.229345	0.411689
I	B1	DMSO		0.957377	2.42995	0.151806	1.17971	0.768534	0.230715	0.405103	0.468117	0.034464	0.229728	0.688002	0.317398	0.281689	0.285104	0.6872	0.417998	0.401171
